# Supplementary material for: Structural mechanism of intracellular autoregulation of zinc uptake in ZIP transporters
Source: Springer Nature journal article supplement (doi:10.1038/s41467-023-39010-6), 2023-06-09
Supplement: 41467_2023_39010_MOESM1_ESM.pdf [file 41467_2023_39010_MOESM1_ESM.pdf]

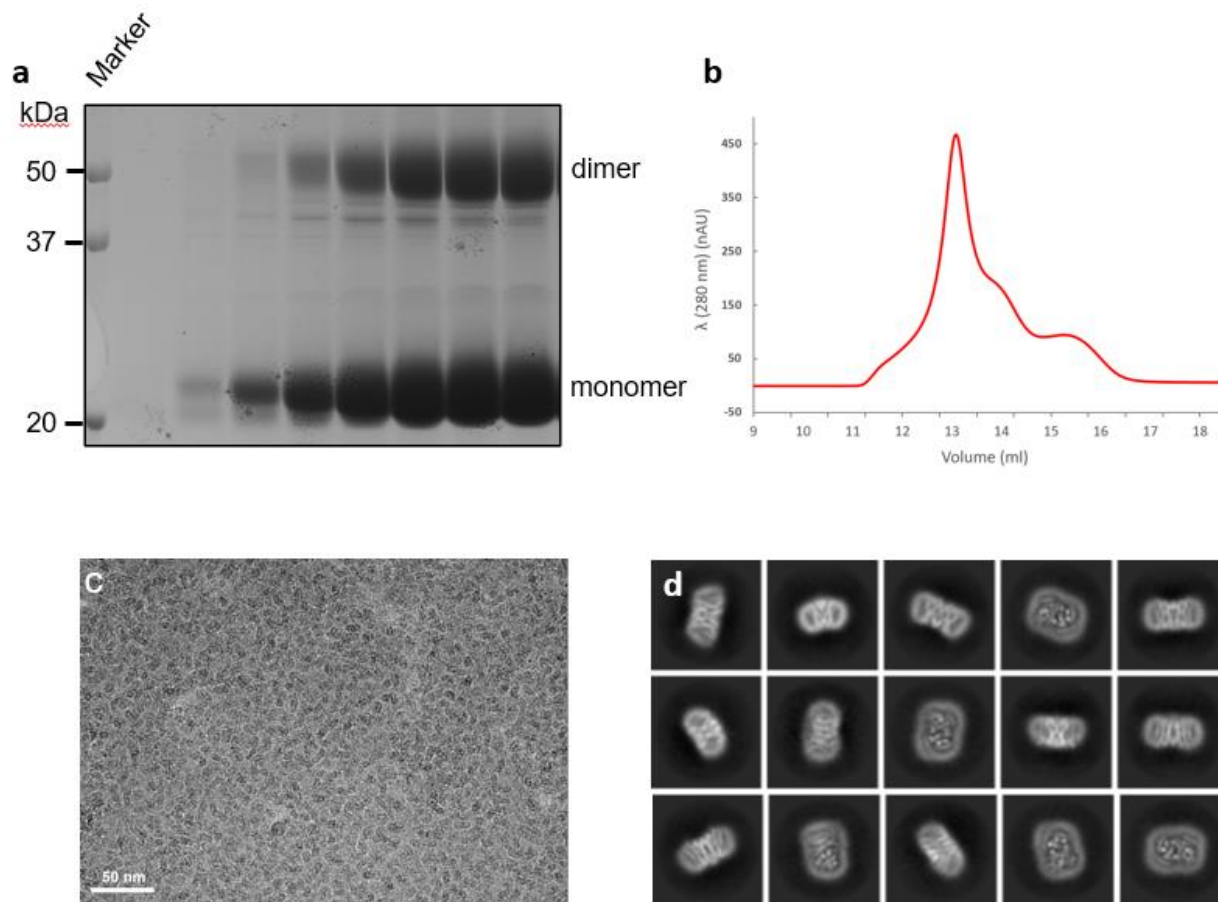

**Supplementary Fig. 1 Protein production and cryo-EM sample preparation.** **a**, SDS-PAGE analysis for the purified *BbZIP*. The figure represents at least three independent experiments with similar results. The lanes are eluted fractions from initial size-exclusion chromatography. **b**, Size-exclusion chromatography (SEC) peak profile of the purified protein reconstituted in amphipol PMAL-C8. **c**, A typical motion-corrected cryo-EM micrograph from a total of 6909 micrographs. Each particle is a 2D projection and alone does not provide adequate resolution for a high-resolution 3D structure. **d**, Selected views of 2D averaged particles.

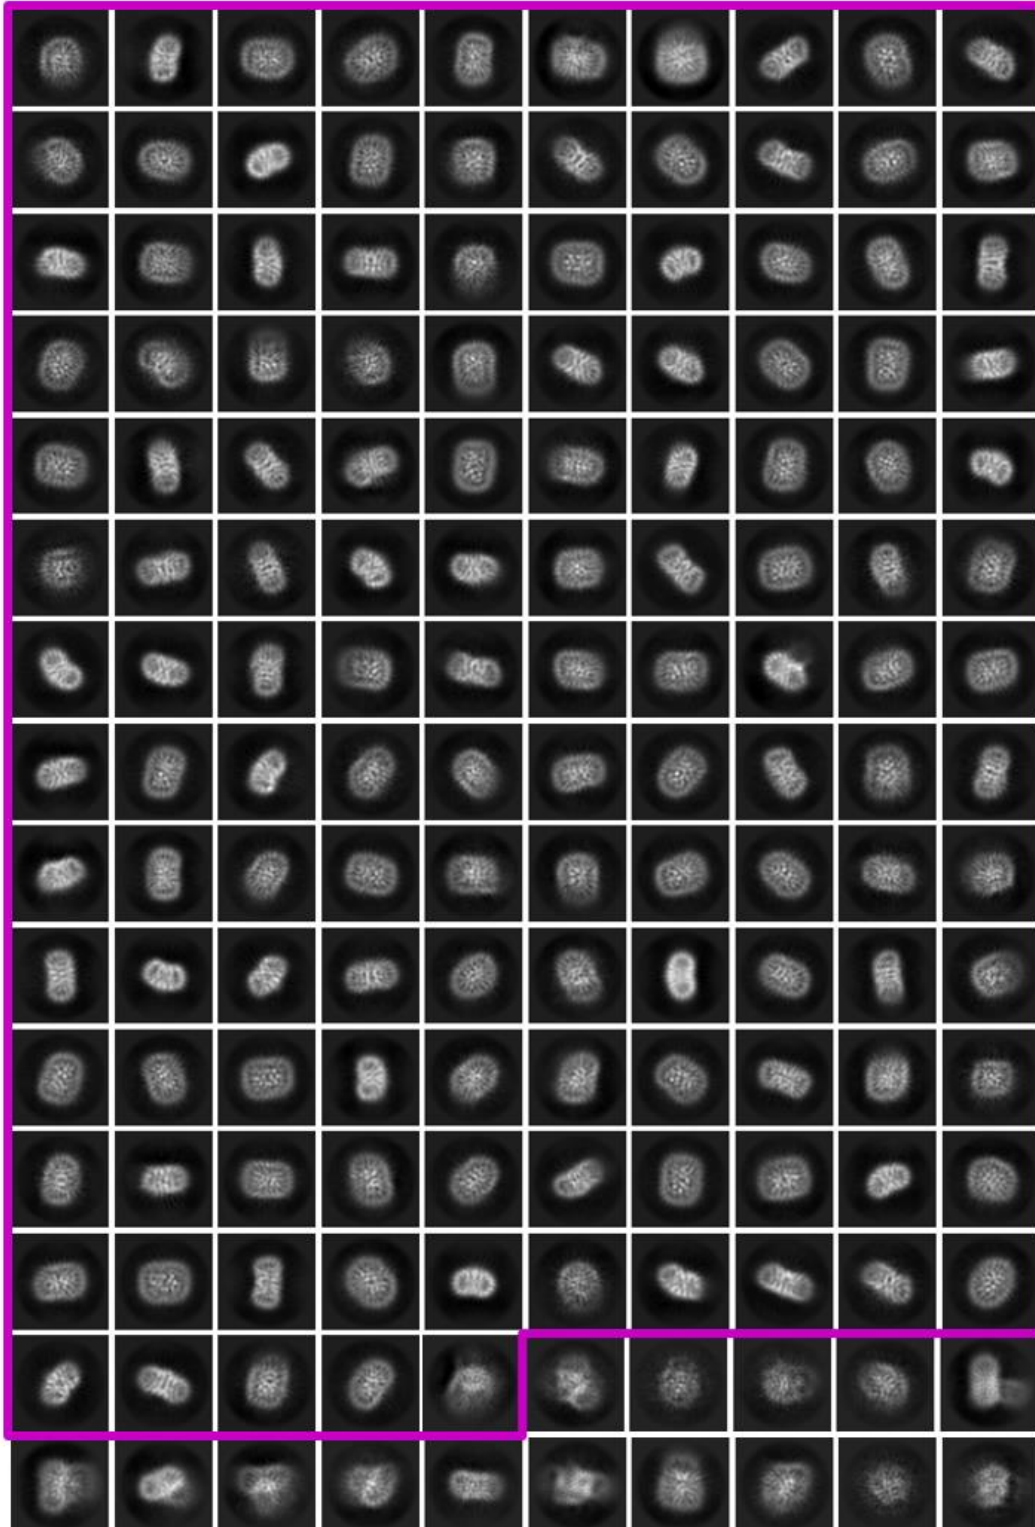

**Supplementary Fig. 2 Classification of particles by 2D averaging.** Particles were 2D class averaged using cryoSPARC with 150 classes. The 135 classes selected for the generation of *ab initio* models are indicated by using a magenta contour.

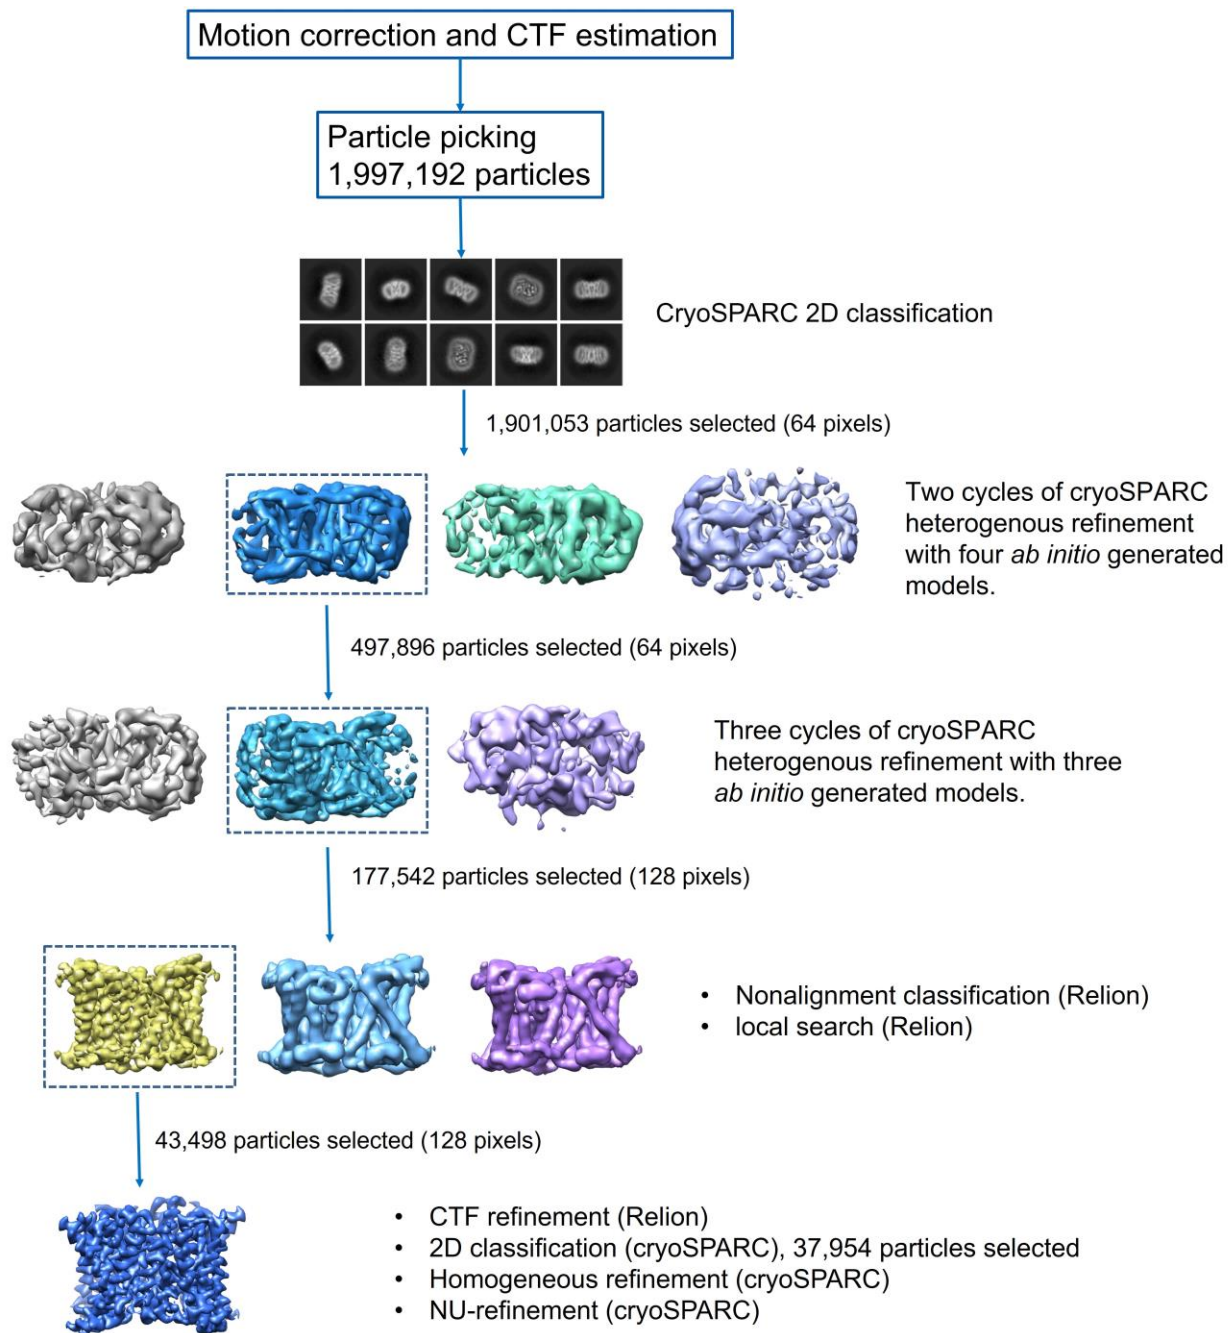

**Supplementary Fig. 3 A data analysis workflow for the reconstruction of the *BbZIP* dimer.**

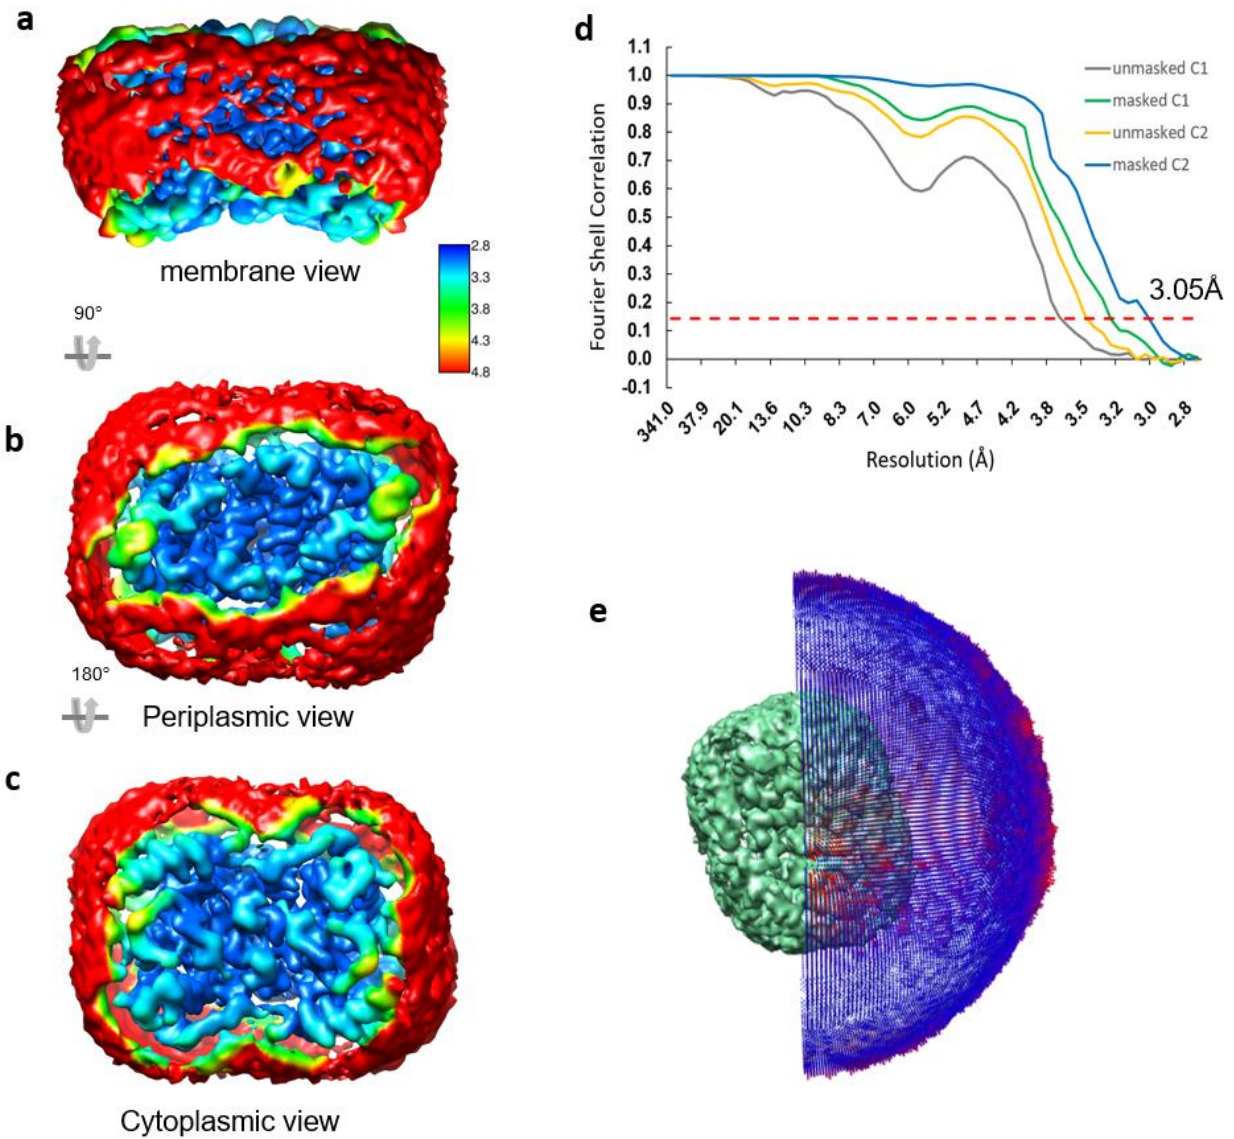

**Supplementary Fig. 4 Structure determination analysis.** **a-c**, Three views for the reconstructed map colored with local resolutions. **d**, Fourier Shell Correlation (FSC) curves for the unmasked and masked 3D reconstruction to determine the resolution with two-fold symmetry (C2) or no symmetry (C1). **e**, Orientation distribution for particles used in the 3D reconstruction.

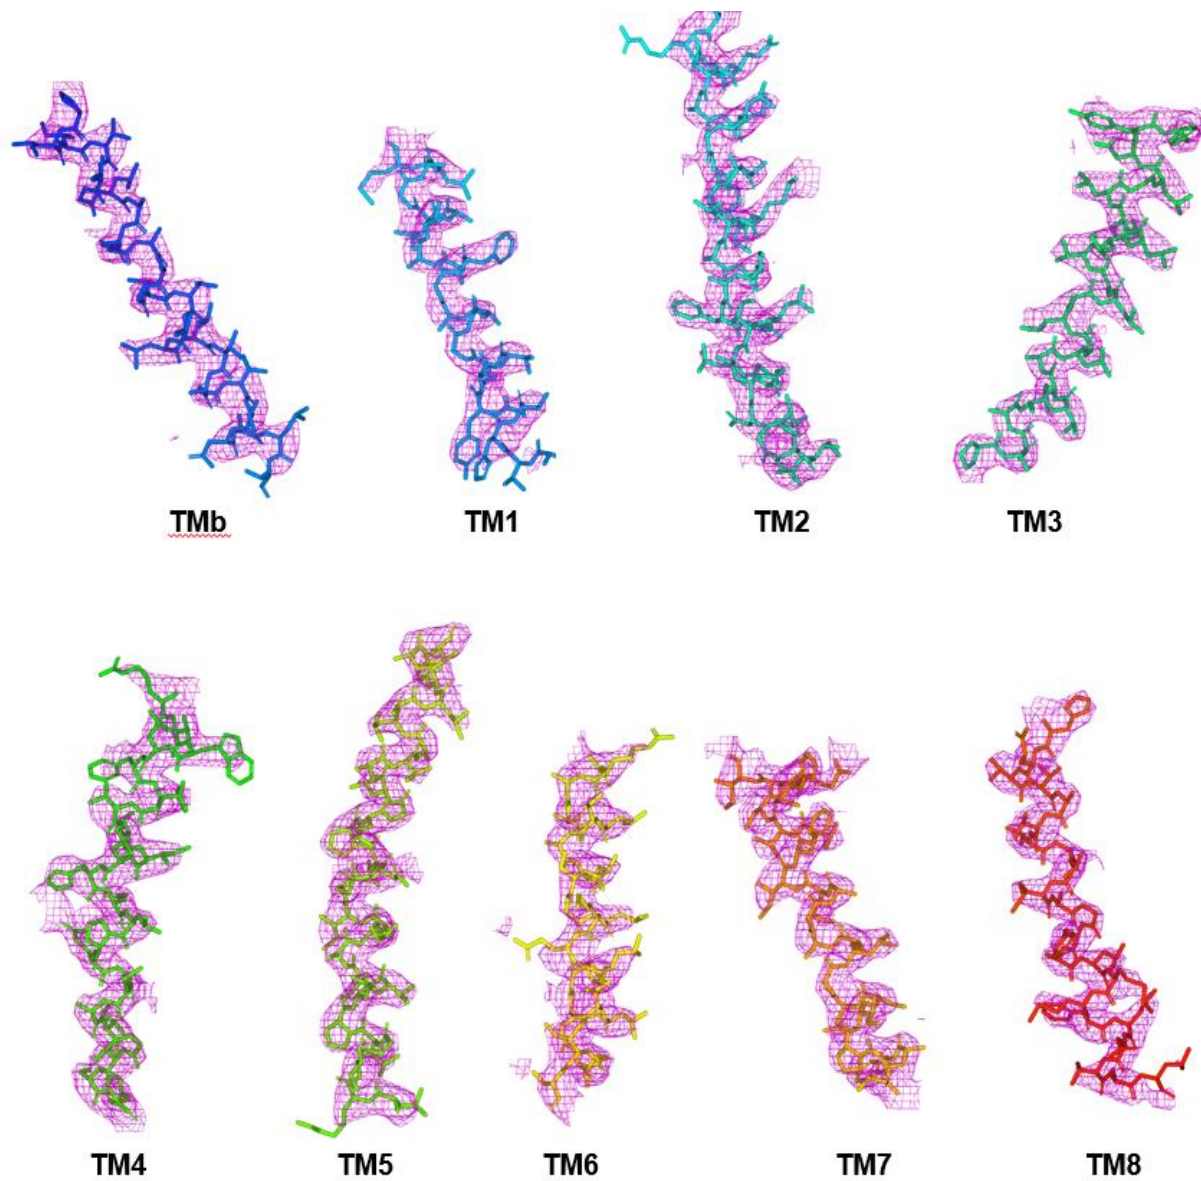

**Supplementary Fig. 5** Cryo-EM densities for the nine transmembrane helices in a *BbZIP* monomer to show the quality of the map. The densities are shown as magenta isomeshes contoured at  $7\sigma$ . Transmembrane helices are shown as sticks.

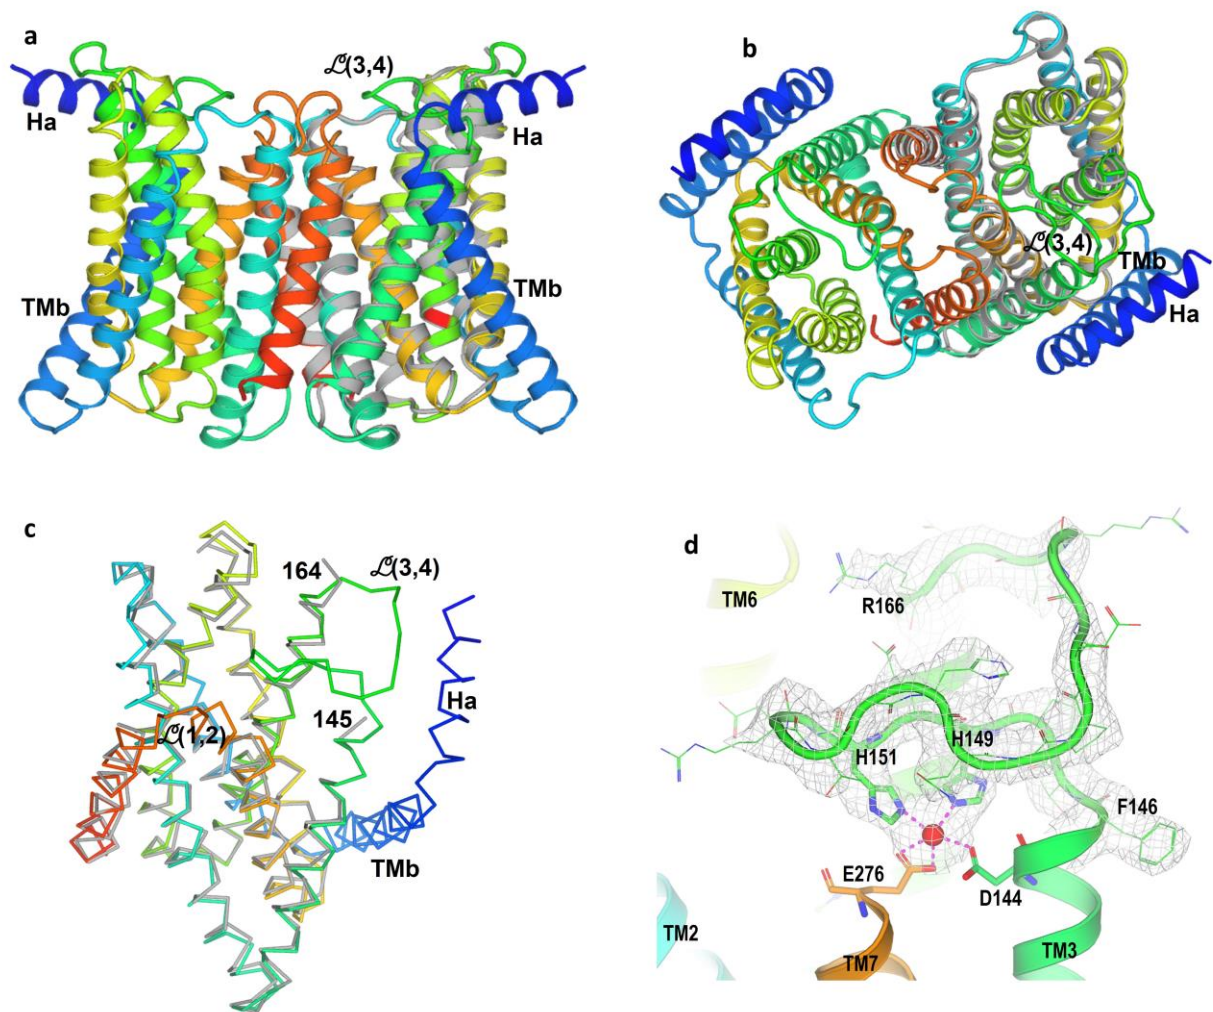

**Supplementary Fig. 6 Structural comparisons of *BbZIP* dimer with its crystal structure.** **a-b**, Two cartoon views of aligned *BbZIP* dimer (rainbow color with N-terminal blue and C-terminal red) and the crystal structure (gray). **c**, A ribbon view of the aligned *BbZIP* protomer to highlight the three regions of difference in the cryo-EM (rainbow color) and crystal structure (gray). The three regions were labeled as Ha and TMB,  $\mathcal{L}(1,2)$ , and loop  $\mathcal{L}(3,4)$ . **d**, Cryo-EM density for the loop  $\mathcal{L}(3,4)$ , covering residues from F146 to R166. The coloring is the same as **c**. Metal ion  $\text{Cd}^{2+}$  is shown as a red sphere.

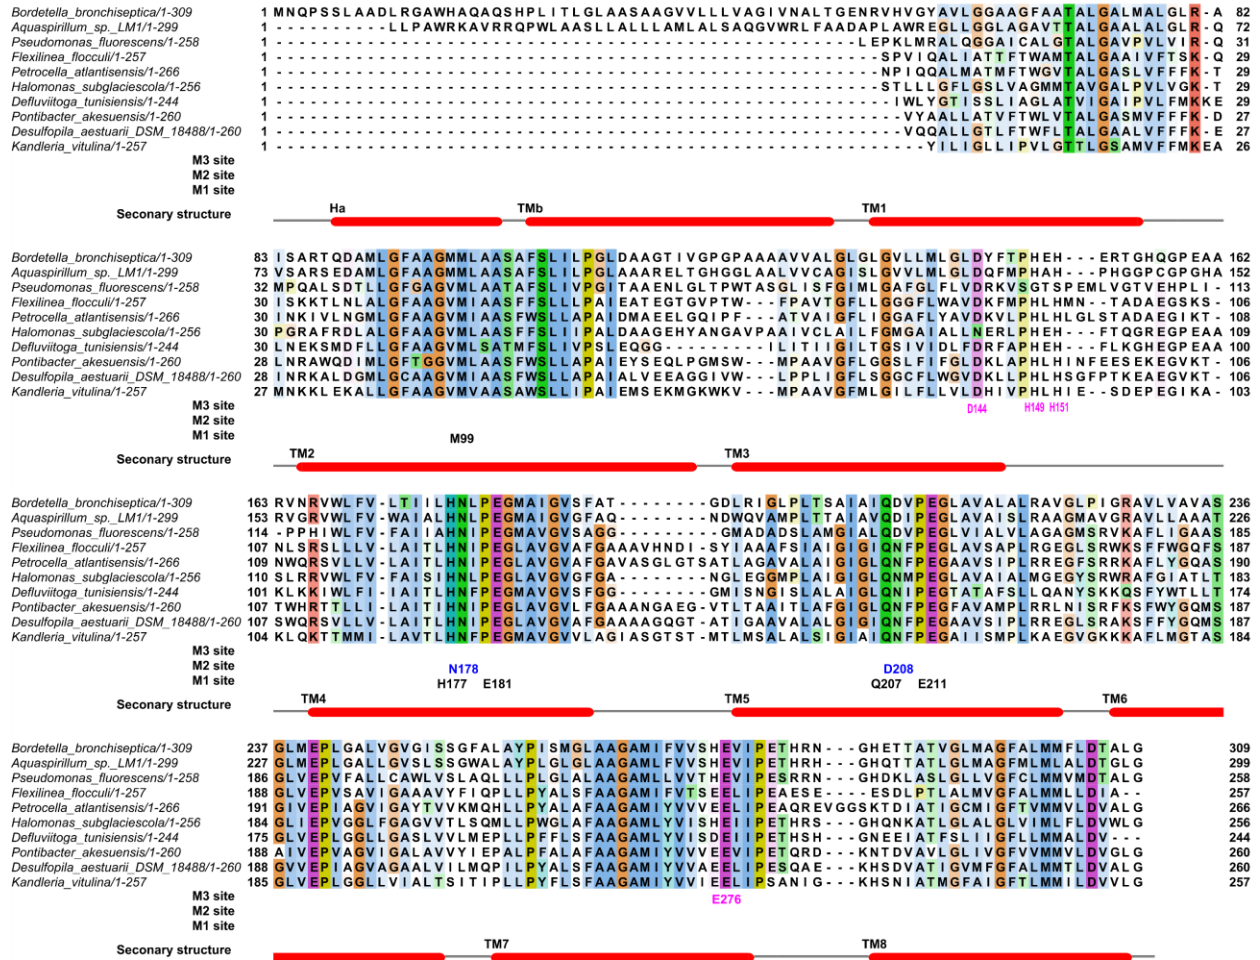

**Supplementary Fig. 7 Sequence alignments of ZIPs.** Residues defining the M1, M2, and M3 sites are indicated and colored differently. The residue numbering is for *BbZIP* (*Bordetella bronchiseptica*). Uniprot numbers used for sequence alignments are A0A0H3LM39 from *Bordetella bronchiseptica*, A0A1U9J125 from *Aquaspirillum*\_sp.\_LM1, A0A5E6W282 from *Pseudomonas fluorescens*, A0A0S7BU43 from *Flexilinea flocculi*, A0A3P7PD27 from *Petrocella atlantisensis*, A0A1M711H2 from *Halomonas subglaciescola*, A0A0C7NZ34 from *Defluviitoga tunisiensis*, A0A1I7GPW4 from *Pontibacter akesuensis*, A0A1M7YB74 from *Desulfopila aestuarii* DSM 18488, and A0A1H2R0P4 from *Kandleria vitulina*.

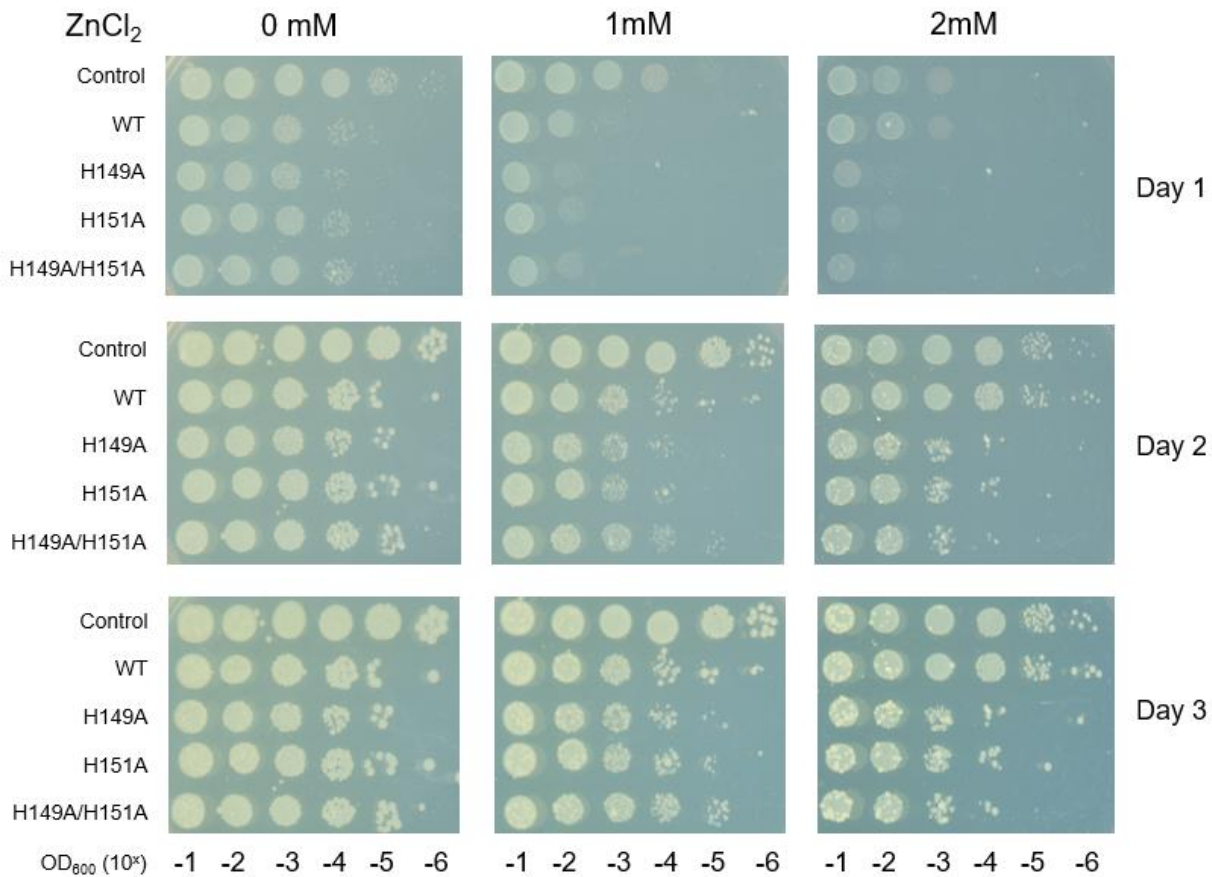

**Supplementary Fig. 8 Cell growth viability assays of *BbZIP* wild-type and histidine mutants in the loop  $\mathcal{L}(3,4)$ .** *E. coli* C43 cells transformed with indicated plasmids for plating Agar-LB plates with indicated ZnCl<sub>2</sub> and presence of 0.2 mM IPTG (final). Before plating, cells were diluted to indicated OD<sub>600</sub> values. “x” indicates the dilution factor from 10<sup>-1</sup> to 10<sup>-6</sup>. The cell growth was monitored on day 1, day 2, and day 3. Compared with the control which has an empty plasmid, histidine mutants in the loop showed increased cell toxicity with externally added Zn<sup>2+</sup> concentration at 1 or 2 mM.





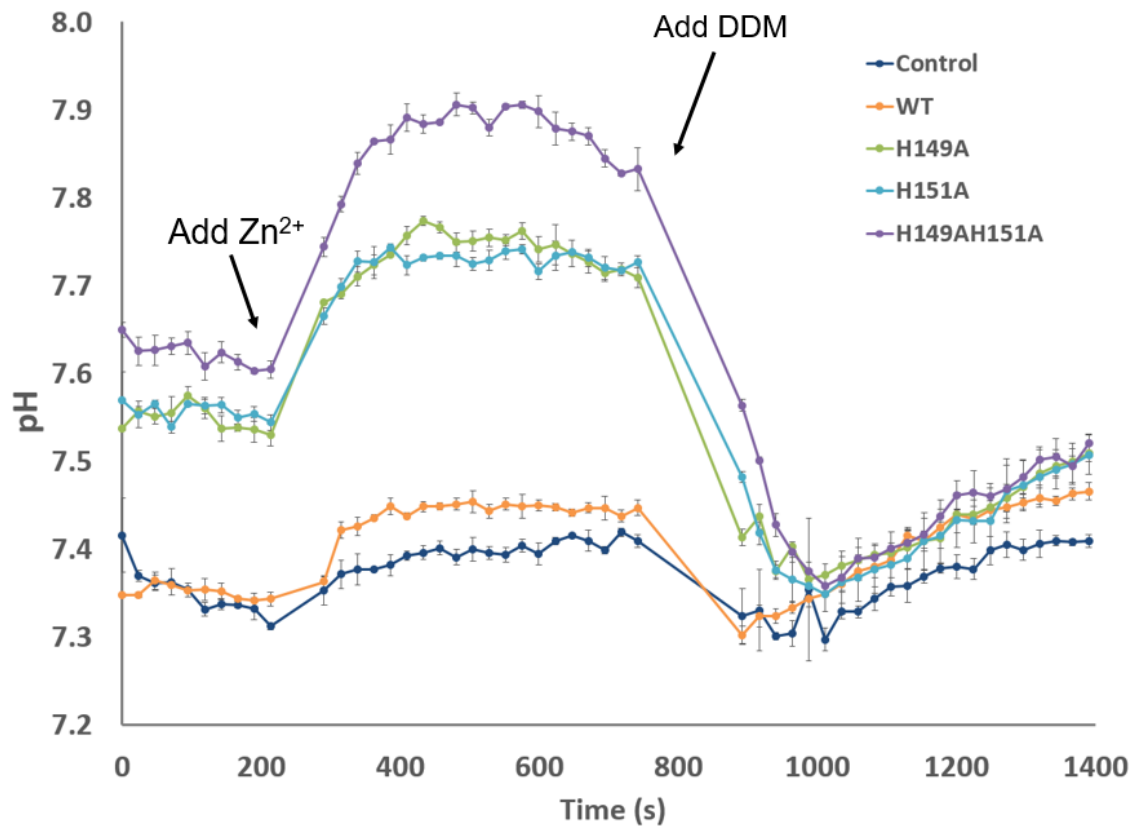

**Supplementary Fig. 10 Zn<sup>2+</sup> uptake by *BbZIP* induced intracellular pH change.** Cells transformed by indicated plasmids were used for Zn<sup>2+</sup> uptake assay using preloaded BCECF. With externally added Zn<sup>2+</sup> to a final concentration of 500  $\mu$ M at pH 7.5, intracellular fluorescence intensities normalized to OD<sub>600</sub> were measured. Data are presented as mean values  $\pm$  SD. The error bar is the standard deviation (s.d.) derived from three different samples. The experiments were replicated at least three times.

**Supplementary Table 1 Cryo-EM data collection, 3D reconstruction, and refinement statistics.**

---

| <b>Data Collection</b>                              |                  |
|-----------------------------------------------------|------------------|
| Microscope                                          | Titan Krios G3i  |
| Magnification                                       | 130 Kx           |
| Stage type                                          | Autoloader       |
| Voltage (kV)                                        | 300              |
| Detector                                            | Gatan K3         |
| Energy filter (eV)                                  | 15               |
| Acquisition mode                                    | Super-resolution |
| Physical pixel size (Å)                             | 0.666            |
| Defocus range (µm)                                  | 0.7-2.5          |
| Electron exposure (e <sup>-</sup> /Å <sup>2</sup> ) | 64               |

---

| <b>Reconstruction</b>                     |                               |
|-------------------------------------------|-------------------------------|
| Software                                  | Relion v3.08, cryoSPARC v2.15 |
| Particles picked                          | 1,997,192                     |
| Particles final                           | 37,954                        |
| Extraction box size (pixels)              | 256                           |
| Rescaled box size (pixels)                | 64                            |
| Final pixel size                          | 1.332                         |
| Symmetry imposed                          | C2                            |
| Map resolution (Å)                        | 3.05                          |
| FSC threshold                             | 0.143                         |
| Map resolution range (Å)                  | 341-2.77                      |
| Map sharpening B-factor (Å <sup>2</sup> ) | 41                            |

---

**model refinement**

|                           |            |
|---------------------------|------------|
| Software                  | PHENIX     |
| Refinement algorithm      | Real Space |
| Clipped box size (pixels) | None       |
| Number of residues        | 608        |
| Number of Cadmium         | 6          |
| Number of lipids          | 2          |
| R.m.s deviations          |            |
| Bond length (Å)           | 0.004      |
| Bond angle (°)            | 0.641      |
| Molprobit clashscore      | 5.60       |
| Rotamer outliers (%)      | 0.0        |
| C $\beta$ deviations (%)  | 0.0        |
| Ramachandran plot         |            |
| Favored (%)               | 93.05      |
| Allowed (%)               | 6.62       |
| Outliers (%)              | 0.33       |
| PDB code                  | 8GHT       |
